# Supplementary material
Source: MDPI journal article supplement (https://www.mdpi.com/1999-4907/13/6/822)
Supplement: s1 [file s1]

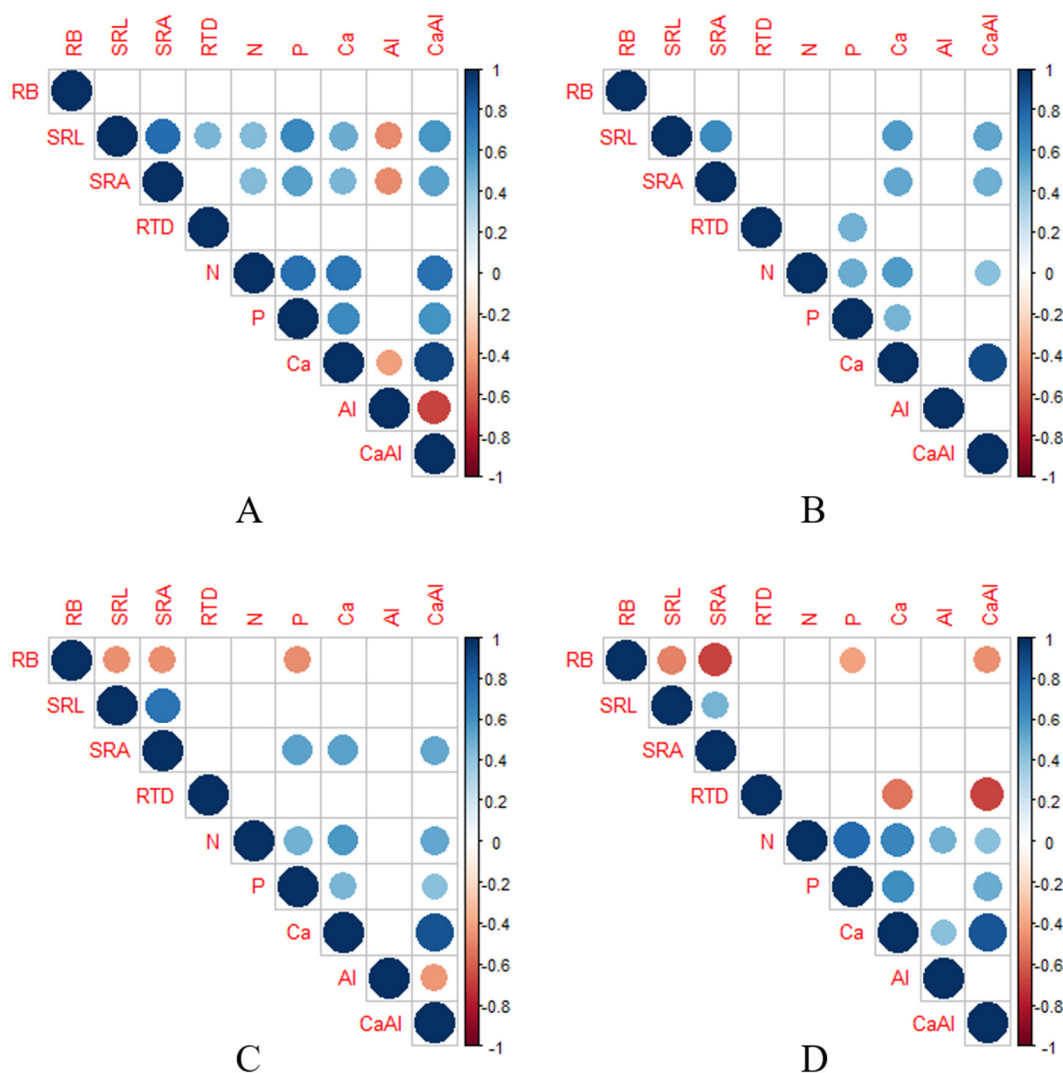

Figure S1. Pearson's correlation analysis for root traits of the Chinese fir seedlings treated with liming. Abbreviation showed above. A, AR in mild acidification soil; B, TR in mild acidification soil; C, AR in severe acidification soil; D, TR in severe acidification soil.
